# Supplementary material for: Gain of Spontaneous clpX Mutations Boosting Motility via Adaption to Environments in Escherichia coli
Source: Front Bioeng Biotechnol. 2021 Nov 24;9:772397. doi: 10.3389/fbioe.2021.772397 (PMC8652233; doi:10.3389/fbioe.2021.772397)
Supplement: Supplementary file 1 [file Table2.XLSX]

## Sheet: Sheet1
Supplementary Table S2. Strains used in this work.
Strains and Plasmids	Genotype and corresponding characteristics	Description	Source
NCM3722 derivate
NCM3722	wild-type E. coli K12 strain	wild-type E. coli K12 strain	You et al., 2013*
CY598	fliC (MG1655) fliT-kan (Kmr)	fixed NCM3722 with wild-type fliC	This study
CY706	fliC (MG1655) fliT-kan, clpXV78F (Kmr)	hyper-motile mutant evolved from CY598	This study
CY708	fliC (MG1655) fliT-kan, clpXV78F, an inversion fragment between rrlD and rrlC (Kmr)	hyper-motile mutant evolved from CY598	This study
CY1066	fliC (MG1655) fliT-kan, clpXV78F , an inversion fragment between rrlD and rrlC, ∆flhDC::cat (Kmr, Chlr)	flhDC deletion in CY708 background	This study
CY1102	fliC (MG1655) fliT-kan, clpXV78F-cat (Kmr, Chlr)	clpXV78Fconstructed in CY598 background	This study
CY1120	fliC (MG1655) fliT-kan, clpXWT-flag-stop codon-cat (Kmr, Chlr)	clpX-flag constructed in CY598 background	This study
CY1121	fliC (MG1655) fliT-kan, flhD-tag-free-stop codon-cat (Kmr, Chlr)	flhD-tag-free-cat constructed in CY598 background	This study
CY1126	fliC (MG1655) fliT-kan, clpXV78F-flag-stop codon-cat (Kmr, Chlr)	clpX-flag constructed in CY1102 background (cat in CY1102 was flipped out first)	This study
CY1166	fliC (MG1655) fliT-kan, an inversion fragment between rrlD and rrlC, clpXWT-cat (Kmr, Chlr)	clpXV78F complemented with clpXWT-cat in CY708 background	This study
CY1175	fliC (MG1655) fliT-kan, ∆clpX::cat (Kmr, Chlr)	clpXdeletion in CY598 background	This study
CY1176	fliC (MG1655) fliT-kan, clpXV78F, an inversion fragment between rrlD and rrlC, flhD-tag-free-stop codon-cat (Kmr, Chlr)	flhD-tag-free-cat constructed in CY708 background	This study
CY1179	fliC (MG1655) fliT-kan, ∆clpX (Kmr)	cat flipped out in CY1175 background	This study
CY1180	fliC (MG1655) fliT-kan, clpXV78F, flhD-tag-free-stop codon-cat (Kmr, Chlr)	flhD-tag-free-cat constructed in CY1102 background (cat in CY1102 was flipped out first)	This study
CY1206	fliC (MG1655) fliT-kan, an inversion fragment between rrlD and rrlC, clpXV78F-flag-stop codon-cat (Kmr, Chlr)	clpX-flag constructed in CY708 background	This study
CY1207	fliC (MG1655) fliT-kan, an inversion fragment between rrlD and rrlC, clpXWT-flag-stop codon-cat (Kmr, Chlr)	clpX-flag constructed in CY1166 background (cat in CY1166 was flipped out first)	This study
CY1210	fliC (MG1655) fliT-kan, flhC-flag-stop codon-cat (Kmr, Chlr)	flhC-flag constructed in CY598 background	This study
CY1211	fliC (MG1655) fliT-kan, clpXV78F, flhC-flag-stop codon-cat (Kmr, Chlr)	flhC-flag constructed in CY1102 background (cat in CY1102 was flipped out first)	This study
CY1216	fliC (MG1655) fliT-kan, clpXWT, an inversion fragment between rrlD and rrlC, flhD-tag-free-stop codon-cat (Kmr, Chlr)	flhD-tag-free-cat constructed in CY1166 background (cat in CY1166 was flipped out first)	This study
CY1217	fliC (MG1655) fliT-kan, ∆clpX, flhD-tag-free-stop codon-cat (Kmr, Chlr)	flhD-tag-free-cat constructed in CY1179 background	This study
BL21 derivate
CY1221	∆clpP::cat (Chlr)	clpP deletion in E. coli BL21 strain	This study
CY1222	∆clpP::cat, pCY519 (Chlr, Kmr)	CY1221 transformed with plasmid pCY519	This study
CY1223	∆clpP::cat, pCY524 (Chlr, Kmr)	CY1221 transformed with plasmid pCY524	This study
CY1234	pCY526 (Kmr)	E. coli BL21 transformed with plasmid pCY526	This study
CY1279	pCY531 (Kmr)	E. coli BL21 transformed with plasmid pCY531	This study
MG1655 derivate
CY562	MG1655 PflhD without IS insertion	non-motile MG1655 strain	Lab stocka
CY570	MG1655 PflhD with IS insertion	hyper-motile MG1655 strain	Lab stockb
CY597	MG1655 PflhD with IS insertion fliT-kan (Kmr)	fliT-kan fusion in CY570
Plasmids
pCY519	pET28a carrying the clpXWT gene (Kmr)	clpXWT was subcloned between NdeI and HindIII in pET28a	This study
pCY524	pET28a carrying the clpXV78F gene (Kmr)	clpXV78F was subcloned between NdeI and HindIII in pET28a	This study
pCY526	pET24a carrying the clpP gene (Kmr)	clpP was subcloned between NheI and XhoI in pET24a	This study
pCY531	pET28a carrying the flhD gene (Kmr)	flhD was subcloned between NdeI and HindIII in pET28a	This study
aWang Y. laboratory collection at Beijing University.
b Fu X. laboratory collection at CAS Shenzhen.
*You C , Okano H , Hui S , et al. Coordination of bacterial proteome with metabolism by cyclic AMP signalling. Nature. 2013; 500 (7462).
Kmr, kanamycin resistant; Chlr, chloramphenicol resistant.
