# Supplementary material for: Gain of Spontaneous clpX Mutations Boosting Motility via Adaption to Environments in Escherichia coli
Source: Front Bioeng Biotechnol. 2021 Nov 24;9:772397. doi: 10.3389/fbioe.2021.772397 (PMC8652233; doi:10.3389/fbioe.2021.772397)
Supplement: Supplementary file 4 [file Table3.XLSX]

## Sheet: Sheet1
Supplementary Table S3. Q-PCR Primers used in this work.
Primer Pair	Primer Name	Sequence (5’-3’)	Source
flhD	qflhD F	TCC GCA AAT GGT TAA GCT GG	This study
	qflhD R	AGC GTG TTG AGA GCA TGA TG	This study
flhC	qflhC F	CTG CCA TTC TCA ACC GAC TG	This study
	qflhC R	TCG ACG CCA TTA CAC AAA CC	This study
fliA	qfliA F	TGA AGT GGC ACA GGC AAT AG	This study
	qfliA R	TGG CTG TTA TTG GTG TCG AG	This study
flgD	qflgD F	CCA GTC GTT ACA GGC CAG TA	This study
	qflgD R	GTA ACT TTG TCT GCC GCC TG	This study
flgA	qfliA F	GCT GGC AAT GTC AAA CTG AA	This study
	qfliA R	GCG AAA CTG GGT TAA CTG GA	This study
fliD	qfliD F	TTG ATT GTT GGC GAT GGT AA	This study
	qfliD R	GGC GGC GTT GTA GTC TTT AG	This study
flhB	qflhB F	TGG ATT TGG TAG GGC TAT GC	This study
	qflhB R	GCC CTT TAA CAT GAG GGT CA	This study
fliC	qfliC F	ATC TTT ACG CTG CGG ATG TG	This study
	qfliC R	CGA CCA CTT CTG TTT TGC CA	This study
pdeH	qpdeH F	CTG GTG GAG CAT ATC CGT CT	This study
	qpdeH R	ACT GAC GCA GCA TCA CAA AC	This study
motA	qmotA F	ATG CAG TGC GTC AAA GTC AC	This study
	qmotA R	GCA CAT GCT CTT CCA GTT CA	This study
tar	qtar F	CGG GTG AAG TGC GTA ATC TT	This study
	qtar R	CGA GTG ACA GCA TTG ACG AT	This study
tsr	qtsr F	CTG GTG AAA CCG ATT GAG GT	This study
	qtsr R	ACC GCT ATA GAT GGC ATT GG	This study
lgoT	qlgoT F	GCT GGC GCG GGA TGT TTA TTA C	This study
	qlgoT R	GAT CTC GGC GGG CAT TGA CGC	This study
argI	qargI F	TGG CCT GAC CAA TGA GTT CC	This study
	qargI R	GGT AAG CGC CGC AGC TTC GAG C	This study
rcsA	qrcsA F	CCG GAA TCT CTC GAC GAT ATC C	This study
	qrcsA R	TGA ATG GTT CCC TGA CCT GCC	This study
yahA	qyahA F	GAG GTG CTT GTC CGC TGG GAA C	This study
	qyahAR	ACC GGC ATC AGA ATA TCC GC	This study
polA (loading control)	qpolA F	CCG TTG CCA AAA GTG ATT CT	This study
	qpolAR	GAT AAA CGT CCC GTT GCA GT	This study
lon (loading control)	qlon F	GGT CAC CGC CGT ACT TAC AT	This study
	qlonR	GCA CTT CAA GCA GTG CAG AG	This study
